# Supplementary material
Source: PubMed Central journal article supplement (PMC5659752)
Supplement: NIHMS899633-supplement-4.pdf [file NIHMS899633-supplement-4.pdf]

### C GH18 chitinase-like superfamily protein (predicted Imaginal disc growth factor (Idgf)-like protein)

VLP  
*A.aegypti*  
*C.inanitus*  
*M.sexta*  
*M.demolitor*  
*N.vitripennis*

1 1 1 1 1 1

MKLFIVSSLAIWLLLAHLNNEVSAVDPHEHNKVVICYWNSTSFERQGPGLKFIVEDLRPAL  
 MWFFKVGALLFLAAL.....VSAANNATTGPKVICCYDGMQSLREGLGKITVTDIELPAL  
 MKQFIQIIFLGLAIRLGG.....ISADQTSNPDKFCYWNSSSFIKSGPAKVNVMDLKLPAL  
 MKILIALAGV.L.AV.....AVATPASVPRKVICCYDSKSYVRESQARMLPMDIDPAL  
 MKVLLAVIA.ALTVSL.....GALDPHEHNKVVICYWNSTSFERPQGPGLKFIQIDDLKLPAL  
 MKLLISTAVAVVLLVLCV..NSAFGVDPHEHSKVVICYWNAVTSFERAGPGLKFIQVDLDRPAL

1 5 10 15 20 25 30 35 40 45 50 55 60

VLP  
*A.aegypti*  
*C.inanitus*  
*M.sexta*  
*M.demolitor*  
*N.vitripennis*

60 54 56 52 54 58

SLCTHLIYGFAGIDANSFDVVP LNPNLDTGAGYAFYRLVTQMKRNFPDLKVVYLGIGGNAD  
 PFCCTHLIYGFAGVNPETYRLKALDESELDSDGKGQYRLATTLLKRRYPNLKVVLLSVGGYKD  
 SLCTHLIYNSAGINSKNYEVVSLKPKIETDSSRGLYRDIVDLKKCFPTLKIYLGIGGGVD  
 SFCCTHLIYGFAGIQPDTYKVP LNENLDVDRAHANYRAITNFKTKYYPGLKVVLLSVGGDAD  
 PFCCTHLIYGFAGIDANSFEAIP LHPNLDTGAGYAFYRIVTQLRQTYPHLKVVYLSIGGNAD  
 SLCTHLIYGFAGINAANFEVVP LNPNLDTGAGYGFYRLVTQLRQFPELKVYVLSIGGNAD

65 70 75 80 85 90 95 100 105 110 115 120

VLP  
*A.aegypti*  
*C.inanitus*  
*M.sexta*  
*M.demolitor*  
*N.vitripennis*

120 114 116 112 114 118

PYE...THKYLTLTETSEARTKFINSVGRLLSDYEFDGDVLEWQFPEVKVKKERGTFGSFF  
 LTEKPPFKYLTLLEESAGSRRTAFVNSVYSTLKTYYDFDGLDLAWQFPQTKPKIRGWTCKV  
 PDSN..YEKYLSSLVEKSQTRNKFITSVVKFATDFNFDGDVLAWQFPVPESSKSENSLTS  
 T.EEA..QKYNLLLESPOARTAFVNSGVLLAEQHGFDGIDLAWQFPRIKPKVRSSTWGS  
 PDY...THKYLTLTETPETRTFRINSMRLVNEYDFDGDIDLAWQFPEVKVKKHRSTLGNV  
 PYE...THKYLTVTETSEARNKFVRSVDRLLQDYDFDGDVLAWQFPVVKVKKNRGTFGSL

125 130 135 140 145 150 155 160 165 170 175 180

VLP  
*A.aegypti*  
*C.inanitus*  
*M.sexta*  
*M.demolitor*  
*N.vitripennis*

178 174 174 169 172 176

.WHKVKKTFGYGKFKDEKKEEHRNGFTALVVRDLKNO LRA..NKALTLTVLPHVNSVYYD  
 .WHGFKKLFITGDSVLDKPADEHRKEEFTALVVRDLKNA LVD..NFKALTLTVLPHVNESIFMD  
 LVNYAKSWIGRGAFKDEKVAEHRKCFNSLVVDLNSLKKQK..NKALTLTVLPHVNV TAYD  
 .WHGKKTTFGTTP.VDDKEAEHRKEEFTALVRELKQALNVKPNMQLA TVLPHVNA SIYYD  
 .WHNKKAFGGGKFKDEKKEEHRNGFTINLVVRDLKVQLRSR..NKALTLTVLPHVNA TIYYD  
 .WHGKKTTFGYGKFKDEKEEQHRDGF TIVVRDLKTQLRAK..NKALTLTVLPHINS SIYYD

185 190 195 200 205 210 215 220 225 230 235 240

VLP  
*A.aegypti*  
*C.inanitus*  
*M.sexta*  
*M.demolitor*  
*N.vitripennis*

236 232 233 227 230 234

VRL LAP NLD AV H L M T F D Q K T P E R N P K E A D F P A P I Y E S Y G R V T D D N V D Y Q T R A W L E N G M P F G  
 V P L L K D N I D Y N L A S F D Q Q T P E R N P K E G D Y T A P I Y E P S E R V E G N N V D A E A S Y W . . Q G T P A  
 P E I L A Q S L D A I H L M A F N K A T P D V N P E T A D Y P A P I Y G R D N . F K T Q C H N D V R Y W T N O K T P K  
 V P A I I N L V D I V N I E A Y D Y F T P E R N P K E A D Y V S P I Y T P Q N R N P L Q N V A A I N Y W L Q S N A P S  
 A R L L A P N I E A V H L M A F D Q V T P E R N P K E A D Y P A P I Y E S Y N R V P Q D N I D A A V R Y W L E H G T P G  
 A R L L T P N L E A I H V F A F D Q S N P E R T P K A D Y P A P I Y E S Y G R E D T D N V D S Q T R Y W L E N G T P G

245 250 255 260 265 270 275 280 285 290 295 300

VLP  
*A.aegypti*  
*C.inanitus*  
*M.sexta*  
*M.demolitor*  
*N.vitripennis*

296 290 292 287 290 294

S K I V I G I E T F G R T W K L T K E S . . E V S G V P P I H A E G P G T E G P H S H I P G V L G Y A E T C S R I L E S  
 G K I V I G I E T Y G R G W K L V E K S . . G I T G V P P I P A D G P S I P G P H S G I N G F Y S W A E V C A K L I P N P  
 E K N V I G I E T H A F T W K L G K S D L R F N S G V P P I A A N G P G A E G V V S S I P G F L S Y A E V C N R L N D K  
 N K L V L G I A S Y S R T W K L D S E S . . E I S G V P P I H T D G A G E A G P Y T K I E G L L S Y P E V C A K L I N P  
 G K I V I G I E A F A R T W K L T S E S . . Q I S G V P P I V A D G P G A E G P H T A T P G I L A Y G E V C T R L T E S  
 G K I V V G I E A F A R T W K L T A D S . . E A A G V P P V T A D G P G A E G P H T G I A G L L S Y A E V C S R L T E H

305 310 315 320 325 330 335 340 345 350 355 360

VLP  
*A.aegypti*  
*C.inanitus*  
*M.sexta*  
*M.demolitor*  
*N.vitripennis*

354 348 352 345 348 352

A.....VDR LRRVGD...PSKKYGSYAYKKYNDQTSEEGIWVGYEDVDTAGNKALYAK  
 GNANLQGADQP LKKIGD...PTRRFYAFRIP.DENEEHGIWVGYEDVDTAGNKAAVYK  
 S.....SSLIKVVDYLNKNSYGSYAYRLYNPKTQEDGIWVGYESYISAEKALYAK  
 NHQ...KGM RPH LRRVTD...PSKRFCTYAFRLP.DDSEGGMVSYEDPDTAGQKASYVT  
 H.....VGR LRRVGD...PSKKYGSYAYQSYNPE TGV DGIWVGYEDRDTAGNKASYK  
 A.....VGR LRRVND...PSKKYGAAYQPYNSGTGT DGIWVGFEDPETAGNKALYAK

365 370 375 380 385 390 395 400 405 410 415 420

VLP  
*A.aegypti*  
*C.inanitus*  
*M.sexta*  
*M.demolitor*  
*N.vitripennis*

404 404 404 399 398 402

A KGLGGVAIFELSLDDFRGICNDGDKFPIVRAAKFKL.  
 A KGLGGISTFDLGNDDVARGACAGDKFPIVRAAKYRL.  
 NNGLGGVAIWDLSNDDVHGTC DGNRFPITSAAKFKLA  
 SKN LGGI SINDLSMDDFRGLCTGDKYPIVRAAKYRL.  
 A KGLGGVAIWDLS TDDFRGICAGDKFPIVHAAKDKL.  
 A KGLGGVAIYDLSLDDFRGVCNDGDKFPIVKGAKFKL.

425 430 435 440 445 450 455



## E *Lh* VLP Bap31-like protein

|                       |   |                                                              |
|-----------------------|---|--------------------------------------------------------------|
| VLP                   | 1 | MSLQWTLIASFLYTEIFIVLLLVLPVASEPRWQKLFKSRFLQSLSNQASMYFLVLLAIVL |
| <i>M. demolitor</i>   | 1 | MSLQWTLIASFLYAEIFIVLLLVLPVASEKRWQSLFKSRFLQSLSNQASFYFVLLAIVL  |
| <i>C. floridans</i>   | 1 | MSIQWTLIAGFLYAEIAVLLLVLPPIASEPTRWQKLFKSRFLQSLSNQASIFYVLLGTLV |
| <i>S. invicta</i>     | 1 | MSLQWTLIAGFLYTEIAIVLLLVLPVASEPTRWQKLFKSRFLQSLINQASIFYVLLGVL  |
| <i>N. vitripennis</i> | 1 | MSLQWTLIATFLYAEIAVLLLVLPPIASEQRWQRFFKSRFLQSLSAQASMYFLVLLAIVL |
| <i>D. mojavensis</i>  | 1 | MSLVWTLIAGFLYTEIAVLLLVLPVGLISEYKWNRFKSKFLAMLAQAQAHLYFLLIMGLV |

1      5      10      15      20      25      30      35      40      45      50      55      60

|                       |    |                                                               |
|-----------------------|----|---------------------------------------------------------------|
| VLP                   | 61 | LFLLDAIREMRKYSN.MEGGEHAHAHLDAEMQGNMRTFRAQRNFYISGFATFLSLVIRRL  |
| <i>M. demolitor</i>   | 61 | LFLLDAIREMRKYSK.LEHTE..HGHLD AEMQGNMRTFRAQRNFYISGFATFLSLVIRRL |
| <i>C. floridans</i>   | 61 | LFLLDAIREMRKYSK.TDHTD.VHPSLNLELQENMRTFRAQRNFYISGFATFLSLVIRRL  |
| <i>S. invicta</i>     | 61 | LFLLDAIREMRKYS.SLDHTD.R.HQLNLELQENMRTFRAQRNFYISGFATFLSLVIRRL  |
| <i>N. vitripennis</i> | 61 | LFLLDAIREMRKYS.S.HEVTEHAHSHLDTEMQGNMRTFRAQRNFYISGFATFLSLVIRRL |
| <i>D. mojavensis</i>  | 61 | LFLLDAIREMRKYSN.TDNSG..EVHLNVEMQHSMRTFRAQRNFYISGFATFLVIVIRKL  |

65      70      75      80      85      90      95      100      105      110      115      120

|                       |     |                                                                    |
|-----------------------|-----|--------------------------------------------------------------------|
| VLP                   | 120 | VL LIS TOASLLAQSEAA MRQAESATT TARTLLSQQTT GESAQNESNEAYDKAVSELK TQT |
| <i>M. demolitor</i>   | 118 | VI LIS TOATLLAQSEAA LRQAQSATT TAKSLLSQQK..GETAQNDSNEAHDKLVTDLKSQV  |
| <i>C. floridans</i>   | 119 | VI LIS TOATLLAQNEAAMRQAQSATT TARSLLSQQRTI GESAQNDSNEAHDKQVSELKQKI  |
| <i>S. invicta</i>     | 119 | VN LIS AQASLLAQNEAAMRQAQSATT TARSLLSQQRTI GESLQNDSNEAHDKAVSELKSQI  |
| <i>N. vitripennis</i> | 120 | VT LIS AQATLLAQSEAS MKQAQSATS AARNLLQKS..GESAQNDTNEVHDKAVTELKAKL   |
| <i>D. mojavensis</i>  | 118 | VQ LIS TOANLLAQSEAS MKQAQSATAA ARSLMTEK..TDKAKEATEDSTLNE LNKLIKER. |

125      130      135      140      145      150      155      160      165      170      175      180

|                       |     |                                                                       |
|-----------------------|-----|-----------------------------------------------------------------------|
| VLP                   | 180 | KELEIKNT ELES E L T REKKDK SAVKSQADSLAKEYDRLTNEHESKLLQQT.....GSDK     |
| <i>M. demolitor</i>   | 176 | SELSQKNT ELEN E L K REKKDK DALKSQAESLAKEYDRLTNEHAKLVKA.....EGGDK      |
| <i>C. floridans</i>   | 179 | KELQVKNL ELEN L V K REKKDK EAIKSQADSLAKEYDRLTNEHAKLIQS.....SSDK       |
| <i>S. invicta</i>     | 179 | KELQAKNQ DLES N L T REKKDK EAIKSQAESLTKEYDRLTNEHAKLLQS.....SDK        |
| <i>N. vitripennis</i> | 178 | K..... ELES E L E KEKKDK AAVKSQAESLAKEYDRLTNEHESKLLSA.....GGDK        |
| <i>D. mojavensis</i>  | 175 | .....VQ ELTS E I N REKKDK EAVKSQAESLN REYDRLTNEEY SKLQKQITIGGGAKGAS I |

185      190      195      200      205      210      215      220      225      230      235      240

|                       |     |     |
|-----------------------|-----|-----|
| VLP                   | 232 | KSD |
| <i>M. demolitor</i>   | 229 | KSD |
| <i>C. floridans</i>   | 231 | KSD |
| <i>S. invicta</i>     | 230 | KTD |
| <i>N. vitripennis</i> | 223 | KSD |
| <i>D. mojavensis</i>  | 229 | KDD |

## F *Lh* VLP knottin-like protein

|                        |   |                                                                                                               |
|------------------------|---|---------------------------------------------------------------------------------------------------------------|
| VLP                    | 1 | MASLKV.LP.LL L A T I I M F . L . A P A I . N A R C S P N G T P C Q P D G R T . P C C T G F C Y . . K Q V G W  |
| <i>N. lecontei</i>     | 1 | MAISMRKILMS L F V . V A V I L A . F I G . T A D A C I R N R D G C Q P D G S Q G N C C S G Y C H . . K E P G W |
| <i>T. pretiosum</i>    | 1 | MASFKSCIIIFV L F A L V A V I M M . M A P . S A M A C I G N G H C Q P D G S M G N C C S G N C Y . . K Q Q G W  |
| <i>B. tabaci</i>       | 1 | MHKYLAWF... I F A . V A T L W M I A G S M A Q G N C I P D G A P C Q A D G S M G N C C T T F C L Q H E Q P G G |
| <i>B. hygida</i>       | 1 | MRMSIKCFA.V I F V A F A F F . L . G Q I S R A E A C I P D G R C H E S D P G P G C C S G F C Y . . R E R N W   |
| <i>M. crystallinum</i> | 1 | MAKVSSLLKFA I V L I I V L S M . S A I I . S A K C I K N G K G C R E D Q G P B F C C S G F C Y . . R Q V G W   |

1      5      10      15      20      25      30      35      40      45      50      55      60

|                        |    |              |
|------------------------|----|--------------|
| VLP                    | 53 | RRGVCSI R.   |
| <i>N. lecontei</i>     | 56 | VAGYCRS R.   |
| <i>T. pretiosum</i>    | 57 | AMGDCR... .  |
| <i>B. tabaci</i>       | 57 | TPGHCTTR S   |
| <i>B. hygida</i>       | 56 | KDGD CRKR P  |
| <i>M. crystallinum</i> | 57 | AR EY CKN R. |

65
