# Supplementary material
Source: PubMed Central journal article supplement (PMC5659752)
Supplement: NIHMS899633-supplement-5.pdf [file NIHMS899633-supplement-5.pdf]

# Data S2: *Lh* VLP GTPase alignments (Related to Main Figures 2, 3A, & 4A - C)

## A Members of the novel *Lh* GTPase family

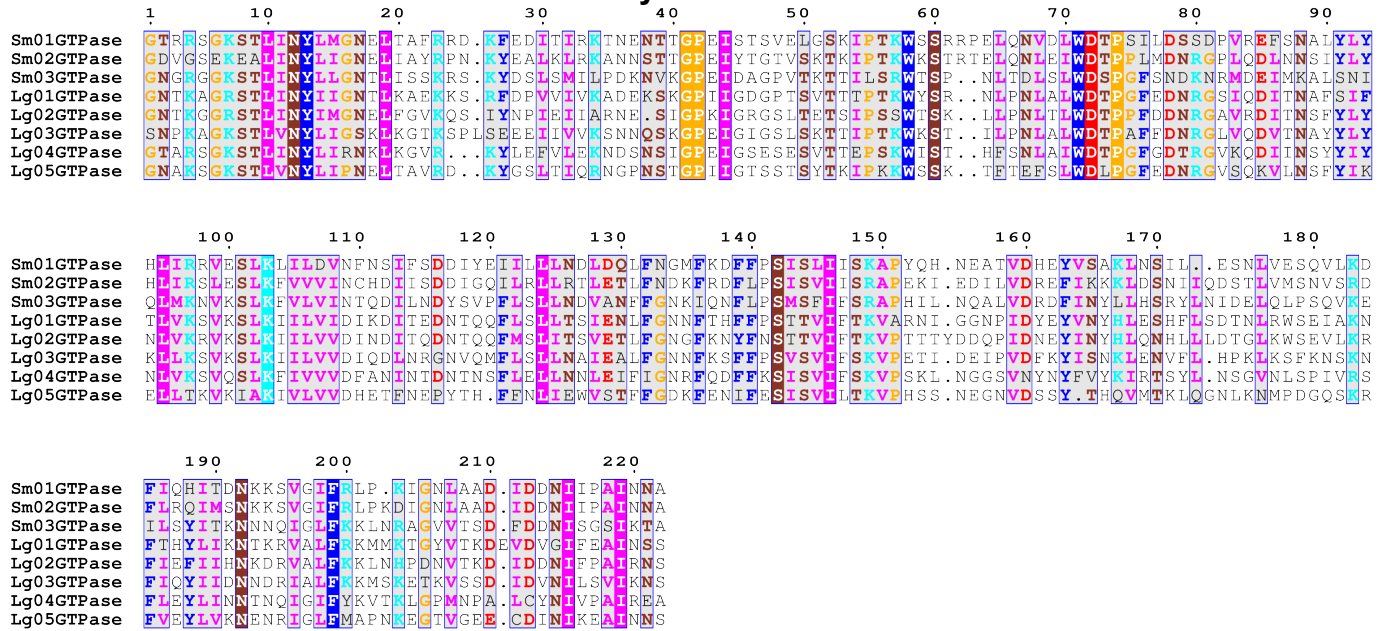

## B *Lh* GTPases aligned with G1 GTPases

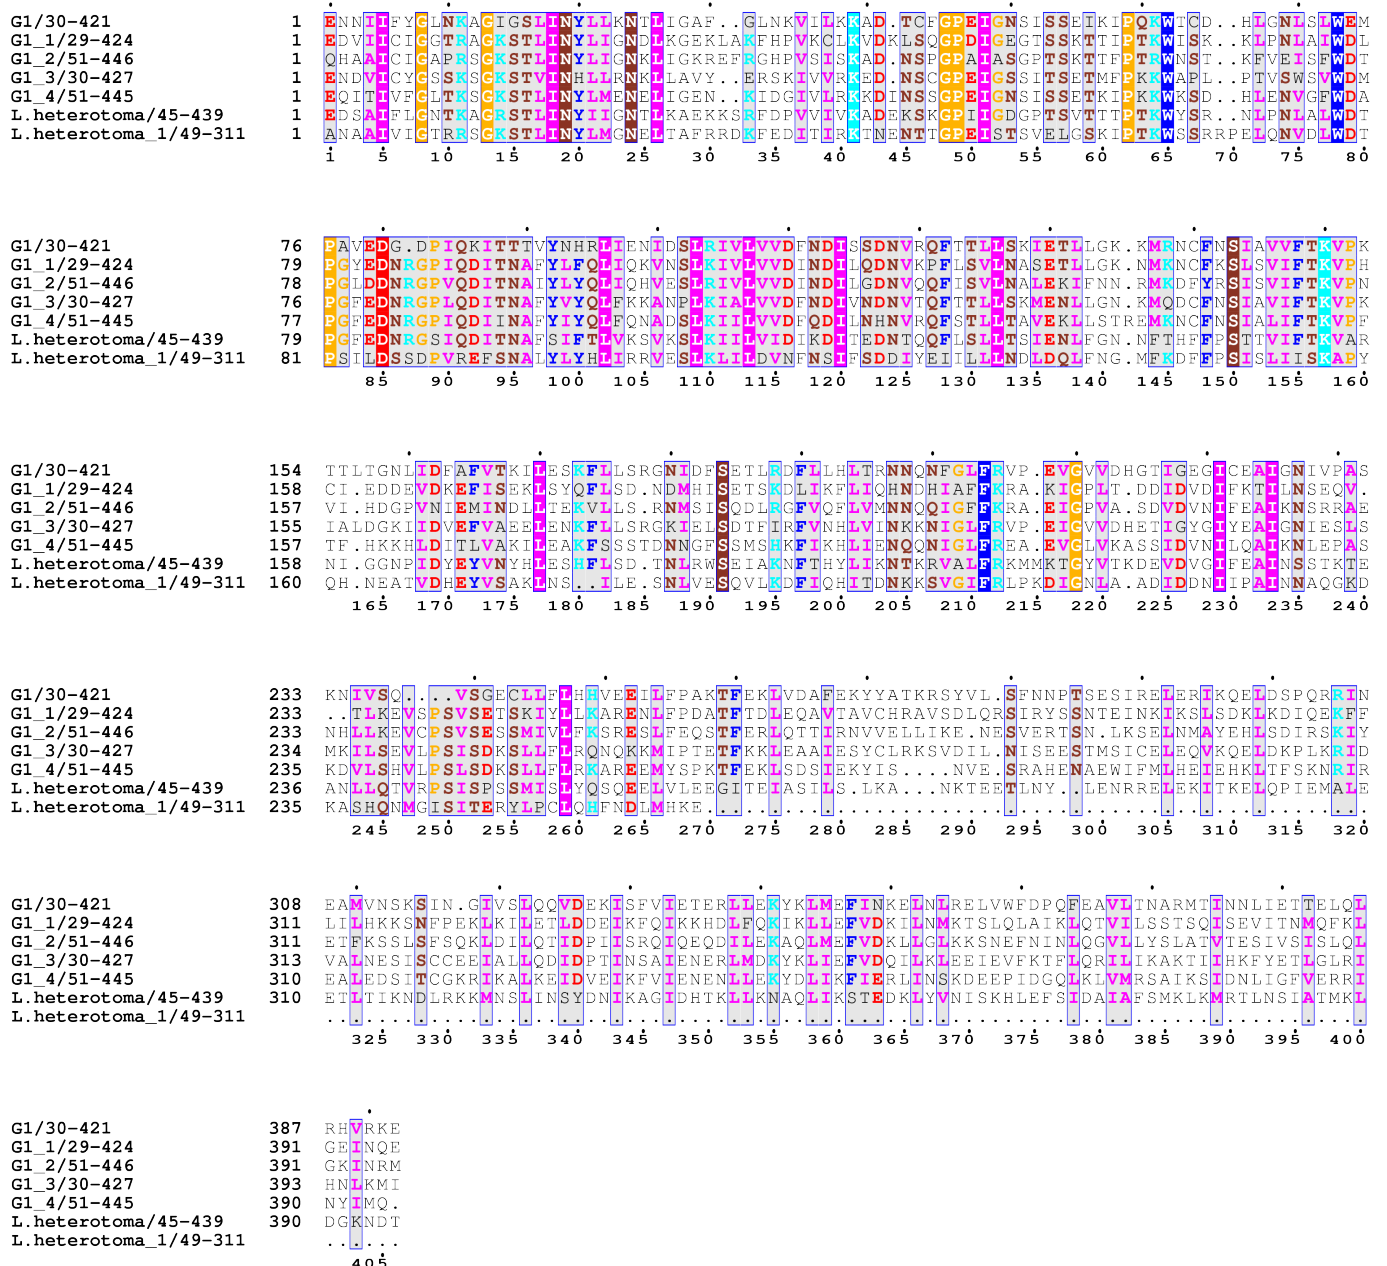

## C *Lh* GTPases aligned with sequences from *L. clavipes*

*L. clavipes*/20-274 1 DDDAVFFSNTKAGKSTLINFLLIGNKTKSTRPSCNRRITIVKADNQSLGPFVIGNTSTSETTPTKWNSTK...LPNLTLDWD  
*L. clavipes* 1/47-172 1 NEDAAICIGTARAGKSTLINFLLIGNETQAKRLNEFDSIRLAV.NNSCGPEIGVGTESKTTIPTKWTSSK...LKNLTLDWD  
*L. clavipes* 2/51-190 1 YEDVALCIGLTRAGKSTLINFLLIGNETIGQRVSLFKPVLVKKADGNSGPEIGIGSTSETMPTKWTSSK...LKNLTLDWD  
*L. heterotoma*/44-298 1 SEDSAIFLGNTRAGKSTLINFLLIGNETIKAEKKSRRFDPVIVKADKESKGPVIGDGPISVITPTKWTSSR...LPNLTLDWD  
*L. heterotoma* 1/48-301 1 SANAAIVIGTRRSAGKSTLINFLLIGNETITAFRRDKFEDITIRKTNENTGPEISVSTVELGSKIPTKWTSSR...LPNLTLDWD  
 1 5 10 15 20 25 30 35 40 45 50 55 60 65 70 75 80

*L. clavipes*/20-274 79 TEAFD DNRGALQDVTNAFYIYQLVKN..VKSLLKTIIVVDISDILEDS TQQFVSLKAVEKFLFGNNFKDYFSSISVIFTKV  
*L. clavipes* 1/47-172 78 TPGFNDNRGAIQDITNAFYIYQLVKNDKIKSLKTIIVINFDLIMEN TE... ..  
*L. clavipes* 2/51-190 79 APGF DNRGPIQDITNAFYIYQLVKN..IKSLKTIIVVDENLNDNIRPFF... ..DSII.VS..  
*L. heterotoma*/44-298 79 TPGFEDNRGSIQDITNAFSTFTLVKS..VKSLLKTIIVVDIKDITEDNTQQFLSLLTSIENLFGNNFTHFFPSTTVIFTKV  
*L. heterotoma* 1/48-301 81 TPSILLDSSDPVREFSNALYLYHLIR..VESLLKTIIVDVFNSITFSDDLYEIIILLNLDLQFLNGMFKDFPSSISLIIISKA  
 85 90 95 100 105 110 115 120 125 130 135 140 145 150 155 160

*L. clavipes*/20-274 157 PNTIHNNTVTIPLIKEILSVNLSDKELNWSVAKNFTQYIIDKNNDRIALFKKMSHEGTVSSD.IDVNIQOTIKNSSSI  
*L. clavipes* 1/47-172 .....  
*L. clavipes* 2/51-190 .....GEFTQ.....  
*L. heterotoma*/44-298 157 ARNIGGNPIDYEVVNYHLESHFLSDTNLRWSEIAKNFTHYLIK.NTKRVALFRKMMKTCYVTKDEVDVGFPEAINSSSTKT  
*L. heterotoma* 1/48-301 159 PYQHNEATVDHEVVSAKLNS..ILESNLVESQVLKDEIQHITD.NKKSVMGIFRLPKDIGNLAAD.IDDNIIPAINNAQCK  
 165 170 175 180 185 190 195 200 205 210 215 220 225 230 235 240

*L. clavipes*/20-274 236 NKIFLQGFRTTIKDSKILL  
*L. clavipes* 1/47-172 .....  
*L. clavipes* 2/51-190 .....  
*L. heterotoma*/44-298 236 EANLLQTVRPSISPPSSMISL  
*L. heterotoma* 1/48-301 235 DKASHQNMGISITERYLPCL  
 245 250 255 260

## D The most similar *Lh* GTPase and *Lc* sequences

*L. clavipes*/22-443 1 DAAVFFSNTKAGKSTLINFLLIGNKTKSTRPSCNRRITIVKADNQSLGPFVIGNTSTSETTPTI  
*L. heterotoma*/46-495 1 DSAIFLGNTRAGKSTLINFLLIGNETIKAEKKSRRFDPVIVKADKESKGPVIGDGPISVITPTI  
 1 5 10 15 20 25 30 35 40 45 50 55 60

*L. clavipes*/22-443 61 PTKWNSITKLPNLTLDWTPAFDDNRGALQDVTNAFYIYQLVKNVKSLLKTIIVVDISDILEED  
*L. heterotoma*/46-495 61 PTKWNSITKLPNLTLDWTPAFDDNRGALQDVTNAFYIYQLVKNVKSLLKTIIVVDISDILEED  
 65 70 75 80 85 90 95 100 105 110 115 120

*L. clavipes*/22-443 121 STQOFVSLIKAVEKFLFGNNFKDYFSSISVIFTKVVPNTIHNNTVTIPLIKEILSVNLSISK  
*L. heterotoma*/46-495 121 NTQOFLSLLTSENLFGNNFTHFFPSTTVIFTKVARNLGGNPIDYEVVNYHLESHFLSDT  
 125 130 135 140 145 150 155 160 165 170 175 180

*L. clavipes*/22-443 181 ELNWSVAKNFTQYIIDKNNDRIALFKKMSHEGTVSSD.IDVNIQOTIKNSSSINKIFLQ  
*L. heterotoma*/46-495 181 NLRWSEIAKNFTHYLIK.NTKRVALFRKMMKTCYVTKDEVDVGFPEAINSSSTKTEANLQ  
 185 190 195 200 205 210 215 220 225 230 235 240

*L. clavipes*/22-443 240 GFRTTIKDSKILLFKAREKLLPFSTIEIENILLEKFKQNKVEMINSITNTSDVKETKNI  
*L. heterotoma*/46-495 240 TVRPSISPPSSMISLYQSQEEIVLEEGITETASISLAKANKTEETINYLENR...RELEKI  
 245 250 255 260 265 270 275 280 285 290 295 300

*L. clavipes*/22-443 300 QNELIELEIILYN.SNKNDLQKQIEIILSIDADIRKKVEDTKFTDKIKLITQFIEKLTIV  
*L. heterotoma*/46-495 297 TKEIQPLEMALLELLIKNDLRRKMMNSLINSYDNKAGIDHTKLLKNAQLITKSTEDKLYV  
 305 310 315 320 325 330 335 340 345 350 355 360

*L. clavipes*/22-443 359 NMSDPLERSLDSIIFSIDSKVKTYSLSQVKIGEISSRQHKENMEETIKAKHD...LEI  
*L. heterotoma*/46-495 357 NISKHLEFSIDAIAFSMKLMRTLNSIATMKI...DGKNDTSNATIIVTPEERNICILEI  
 365 370 375 380 385 390 395 400 405 410 415 420

*L. clavipes*/22-443 414 .....SKLQNDIQK  
*L. heterotoma*/46-495 414 TEFTKVIDEDNDSFLYKIKTFFFSFYGIKITINCGN  
 425 430 435 440 445 450 455
