# Supplementary material
Source: PubMed Central journal article supplement (PMC5659752)
Supplement: NIHMS899633-supplement-Key_resource_table.pdf [file NIHMS899633-supplement-Key_resource_table.pdf]

**KEY RESOURCES TABLE**

| REAGENT or RESOURCE                                                                     | SOURCE                              | IDENTIFIER                                                                                                   |
|-----------------------------------------------------------------------------------------|-------------------------------------|--------------------------------------------------------------------------------------------------------------|
| <b>Antibodies</b>                                                                       |                                     |                                                                                                              |
| anti-p40                                                                                | [9]                                 | N/A                                                                                                          |
| 6x-His tag monoclonal antibody (mouse)                                                  | ThermoFisher Scientific             | Cat # PA1983B                                                                                                |
| alkaline-phosphatase-linked anti-mouse secondary antibody (goat)                        | Promega                             | Cat # S3271                                                                                                  |
| <b>Bacterial and Virus Strains</b>                                                      |                                     |                                                                                                              |
| BL21, Chemically Competent <i>E. coli</i><br><i>F- ompT hsdSB (rBmB-) gal dcm (DE3)</i> | Invitrogen                          | Cat # C600003                                                                                                |
| <b>Biological Samples</b>                                                               |                                     |                                                                                                              |
| <b>Chemicals, Peptides, and Recombinant Proteins</b>                                    |                                     |                                                                                                              |
| Yeast extract                                                                           | Fisher Scientific                   | Cat # S80245-3                                                                                               |
| Tegosept (methyl 4-hydroxybenzoate)                                                     | Fisher Scientific                   | Cat # AC126961000                                                                                            |
| 99.5% Ethanol                                                                           | Fisher Scientific                   | Cat # 64-17-5                                                                                                |
| Nycodenz                                                                                | Axell (Accurate)                    | Cat # AN1002423                                                                                              |
| Rhodamine-tagged Phalloidin                                                             | Invitrogen                          | Cat # R415                                                                                                   |
| Hoechst 33258                                                                           | Invitrogen                          | Cat # H3569                                                                                                  |
| Vecta Shield                                                                            | Vector Laboratories                 | Cat # H1300                                                                                                  |
| <b>Critical Commercial Assays</b>                                                       |                                     |                                                                                                              |
| POROS 20 R2 beads                                                                       | Applied Biosystems                  | Cat # 1112906                                                                                                |
| C18 ZipTips                                                                             | Millipore Sigma                     | Cat # ZTC18S096                                                                                              |
| DNeasy Blood & Tissue Kits                                                              | Qiagen                              | Cat # 69504                                                                                                  |
| <b>Deposited Data</b>                                                                   |                                     |                                                                                                              |
| <i>Lh</i> 14 VLP proteomic data                                                         | This study                          | <a href="http://www.proteomexchange.org/">http://www.proteomexchange.org/</a><br>PRIDE:<br>10.6019/PXD005632 |
| <i>Lh</i> NY VLP proteomic data                                                         | This study                          | <a href="http://www.proteomexchange.org/">http://www.proteomexchange.org/</a><br>PRIDE:<br>10.6019/PXD005639 |
| <b>Experimental Models: Cell Lines</b>                                                  |                                     |                                                                                                              |
| <b>Experimental Models: Organisms/Strains</b>                                           |                                     |                                                                                                              |
| <i>y w</i>                                                                              | Bloomington Drosophila Stock Center | BL # 1495                                                                                                    |
| <i>Dome-Meso-GFP</i>                                                                    | [41]                                | N/A                                                                                                          |
| <i>Leptopilina heterotoma</i> 14                                                        | [3]                                 | N/A                                                                                                          |
| <i>L. heterotoma</i> NY                                                                 | [9]                                 | N/A                                                                                                          |
| <i>L. victorae</i>                                                                      | [9]                                 | N/A                                                                                                          |
| <i>L. boulardi</i> 17                                                                   | [3, 9]                              | N/A                                                                                                          |
| <b>Oligonucleotides</b>                                                                 |                                     |                                                                                                              |
| Forward primer: p40 CD cloning<br>atcgcggatccaagcagaataagaaaccaactgcagatga              | This study                          | N/A                                                                                                          |

|                                                                                                    |                        |                                                                                                                                   |
|----------------------------------------------------------------------------------------------------|------------------------|-----------------------------------------------------------------------------------------------------------------------------------|
| Reverse primer: p40 CD cloning<br>taagccgaattcctaagtaattgtttctccaaggactactaacaatcac                | This study             | N/A                                                                                                                               |
| Forward primer: <i>Wolbachia</i> of <i>L. victoriae</i> <i>coxA</i> gene<br>ttggrcratyaactttatag   | This study             | N/A                                                                                                                               |
| Reverse primer: <i>Wolbachia</i> of <i>L. victoriae</i> <i>coxA</i> gene<br>ctaaagactttkacrcagct   | This study             | N/A                                                                                                                               |
| Forward primer: <i>Wolbachia</i> of <i>L. victoriae</i> <i>gatB</i> gene<br>aaaaggggtcacttcgctgt   | This study             | N/A                                                                                                                               |
| Reverse primer: <i>Wolbachia</i> of <i>L. victoriae</i> <i>gatB</i> gene<br>aggtagcaaatcaggttcaggg | This study             | N/A                                                                                                                               |
| Forward primer: <i>Lh SmGTPase01</i> gene fragment<br>caggactgtgtgcttaattctg                       | This study             | N/A                                                                                                                               |
| Reverse primer: <i>Lh SmGTPase01</i> gene fragment<br>gtagcctgaagatgcctacac                        | This study             | N/A                                                                                                                               |
| Forward primer: <i>p40</i> gene fragment<br>gtgatgatccaaaatgtaacgtgactg                            | This study             | N/A                                                                                                                               |
| Reverse primer: <i>p40</i> gene fragment<br>gaatggtctgttactgttctccaga                              | This study             | N/A                                                                                                                               |
| Recombinant DNA                                                                                    |                        |                                                                                                                                   |
| pCR2.1-TOPO                                                                                        | Invitrogen             | Cat # 450641                                                                                                                      |
| pTrcHisA                                                                                           | Invitrogen             | Cat # V36020                                                                                                                      |
| Software and Algorithms                                                                            |                        |                                                                                                                                   |
| Proteome Discoverer 1.4.0.288                                                                      | ThermoFisher           | Cat #<br>IQLAAEGABSAKJ<br>MAUH                                                                                                    |
| Scaffold 4.7.3                                                                                     | Proteome Software Inc. | <a href="http://www.proteomesoftware.com/products/scaffold/">http://www.proteomesoftware.com/products/scaffold/</a>               |
| BLAST2GO v2.7.0                                                                                    | [44]                   | <a href="https://www.blast2go.com">https://www.blast2go.com</a>                                                                   |
| InterproScan v5.3-46                                                                               | [45]                   | <a href="https://www.ebi.ac.uk/interpro/">https://www.ebi.ac.uk/interpro/</a>                                                     |
| FastAnnotator                                                                                      | [46]                   | <a href="http://fastannotator.cgu.edu.tw">http://fastannotator.cgu.edu.tw</a>                                                     |
| Conserved Domains Database                                                                         | [49, 50]               | <a href="https://www.ncbi.nlm.nih.gov/Structure/cdd/cdd.shtml">https://www.ncbi.nlm.nih.gov/Structure/cdd/cdd.shtml</a>           |
| PFAM 26.0                                                                                          | [51]                   | <a href="http://pfam.xfam.org">http://pfam.xfam.org</a>                                                                           |
| GhostKOALA                                                                                         | [52]                   | <a href="http://www.kegg.jp/ghostkoala/">http://www.kegg.jp/ghostkoala/</a>                                                       |
| FunRich                                                                                            | [59]                   | <a href="http://www.funrich.org">http://www.funrich.org</a>                                                                       |
| MODELLER                                                                                           | [64]                   | <a href="https://salilab.org/modeller/">https://salilab.org/modeller/</a>                                                         |
| LOMETS                                                                                             | [66]                   | <a href="http://zhanglab.ccmb.med.umich.edu/LOMETS/">http://zhanglab.ccmb.med.umich.edu/LOMETS/</a>                               |
| PHYRE2                                                                                             | [67]                   | <a href="http://www.sbg.bio.ic.ac.uk/phyre2/html/page.cgi?id=index">http://www.sbg.bio.ic.ac.uk/phyre2/html/page.cgi?id=index</a> |
| Loopy                                                                                              | [68]                   | <a href="http://honig.c2b2.colu.mbia.edu/loopy/">http://honig.c2b2.colu.mbia.edu/loopy/</a>                                       |
| SCRWL4                                                                                             | [69]                   | <a href="http://dunbrack.fccc.edu/scwrl4/">http://dunbrack.fccc.edu/scwrl4/</a>                                                   |

|                       |                               |                                                                                                                                               |
|-----------------------|-------------------------------|-----------------------------------------------------------------------------------------------------------------------------------------------|
| Autodock Vina         | [72]                          | <a href="http://vina.scripps.edu">http://vina.scripps.edu</a>                                                                                 |
| ProSA-web             | [76]                          | <a href="https://prosa.services.came.sbg.ac.at/prosa.php">https://prosa.services.came.sbg.ac.at/prosa.php</a>                                 |
| Verify 3D             | [77]                          | <a href="http://services.mbi.ucla.edu/Verify_3D/">http://services.mbi.ucla.edu/Verify_3D/</a>                                                 |
| STRIDE                | [78]                          | <a href="http://webclu.bio.wzw.tum.de/stride/">http://webclu.bio.wzw.tum.de/stride/</a>                                                       |
| ModRefiner            | [84]                          | <a href="http://zhanglab.ccmb.med.umich.edu/ModRefiner/">http://zhanglab.ccmb.med.umich.edu/ModRefiner/</a>                                   |
| DaliLITE              | [85]                          | <a href="http://ekhidna.biocenter.helsinki.fi/dali_server/start">http://ekhidna.biocenter.helsinki.fi/dali_server/start</a>                   |
| LSM Image Browser     | Zeiss                         | <a href="https://www.zeiss.com/microscopy/us/downloads/lsm-5-series.html">https://www.zeiss.com/microscopy/us/downloads/lsm-5-series.html</a> |
| Photoshop v12.0.4     | Adobe                         | N/A                                                                                                                                           |
| Photoshop CC 2015.5   | Adobe                         | N/A                                                                                                                                           |
| Illustrator CC 2015.3 | Adobe                         | N/A                                                                                                                                           |
| Other                 |                               |                                                                                                                                               |
| Sanger sequencing     | Genewiz, South Plainfield, NJ | N/A                                                                                                                                           |
